# Supplementary material for: Multi-centuries mean summer temperature variations in the Southern Rhaetian Alps reconstructed from Larix decidua blue-intensity data
Source: Copernicus journal article supplement (doi:10.5194/cp-2023-104), 2024-01-29

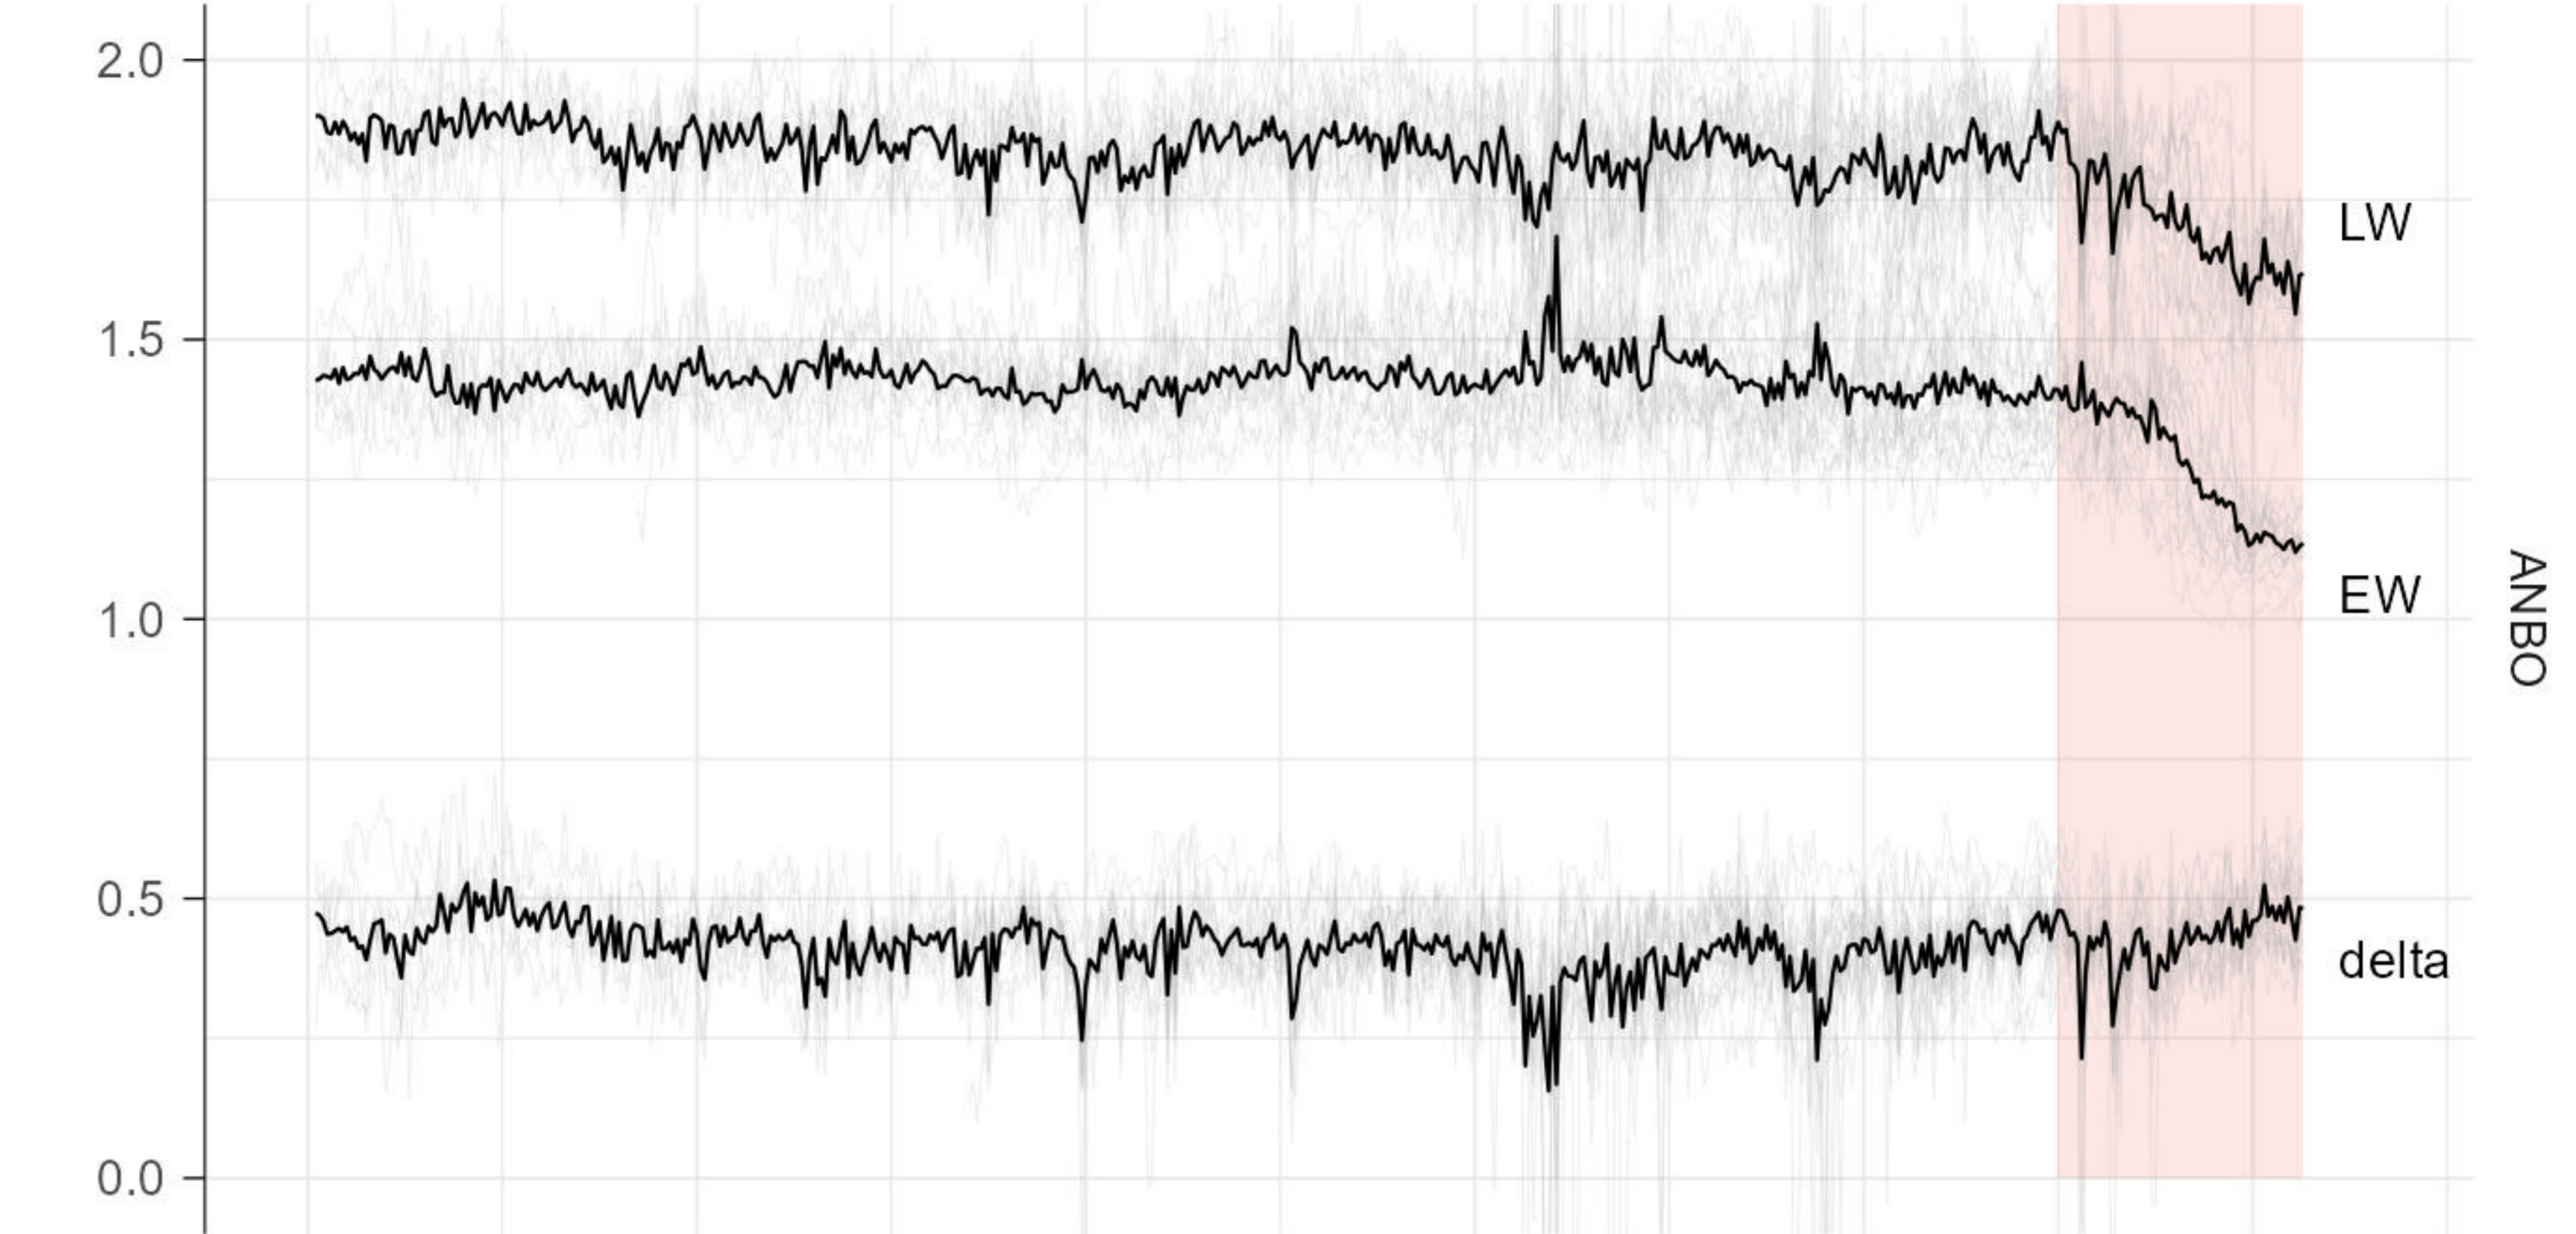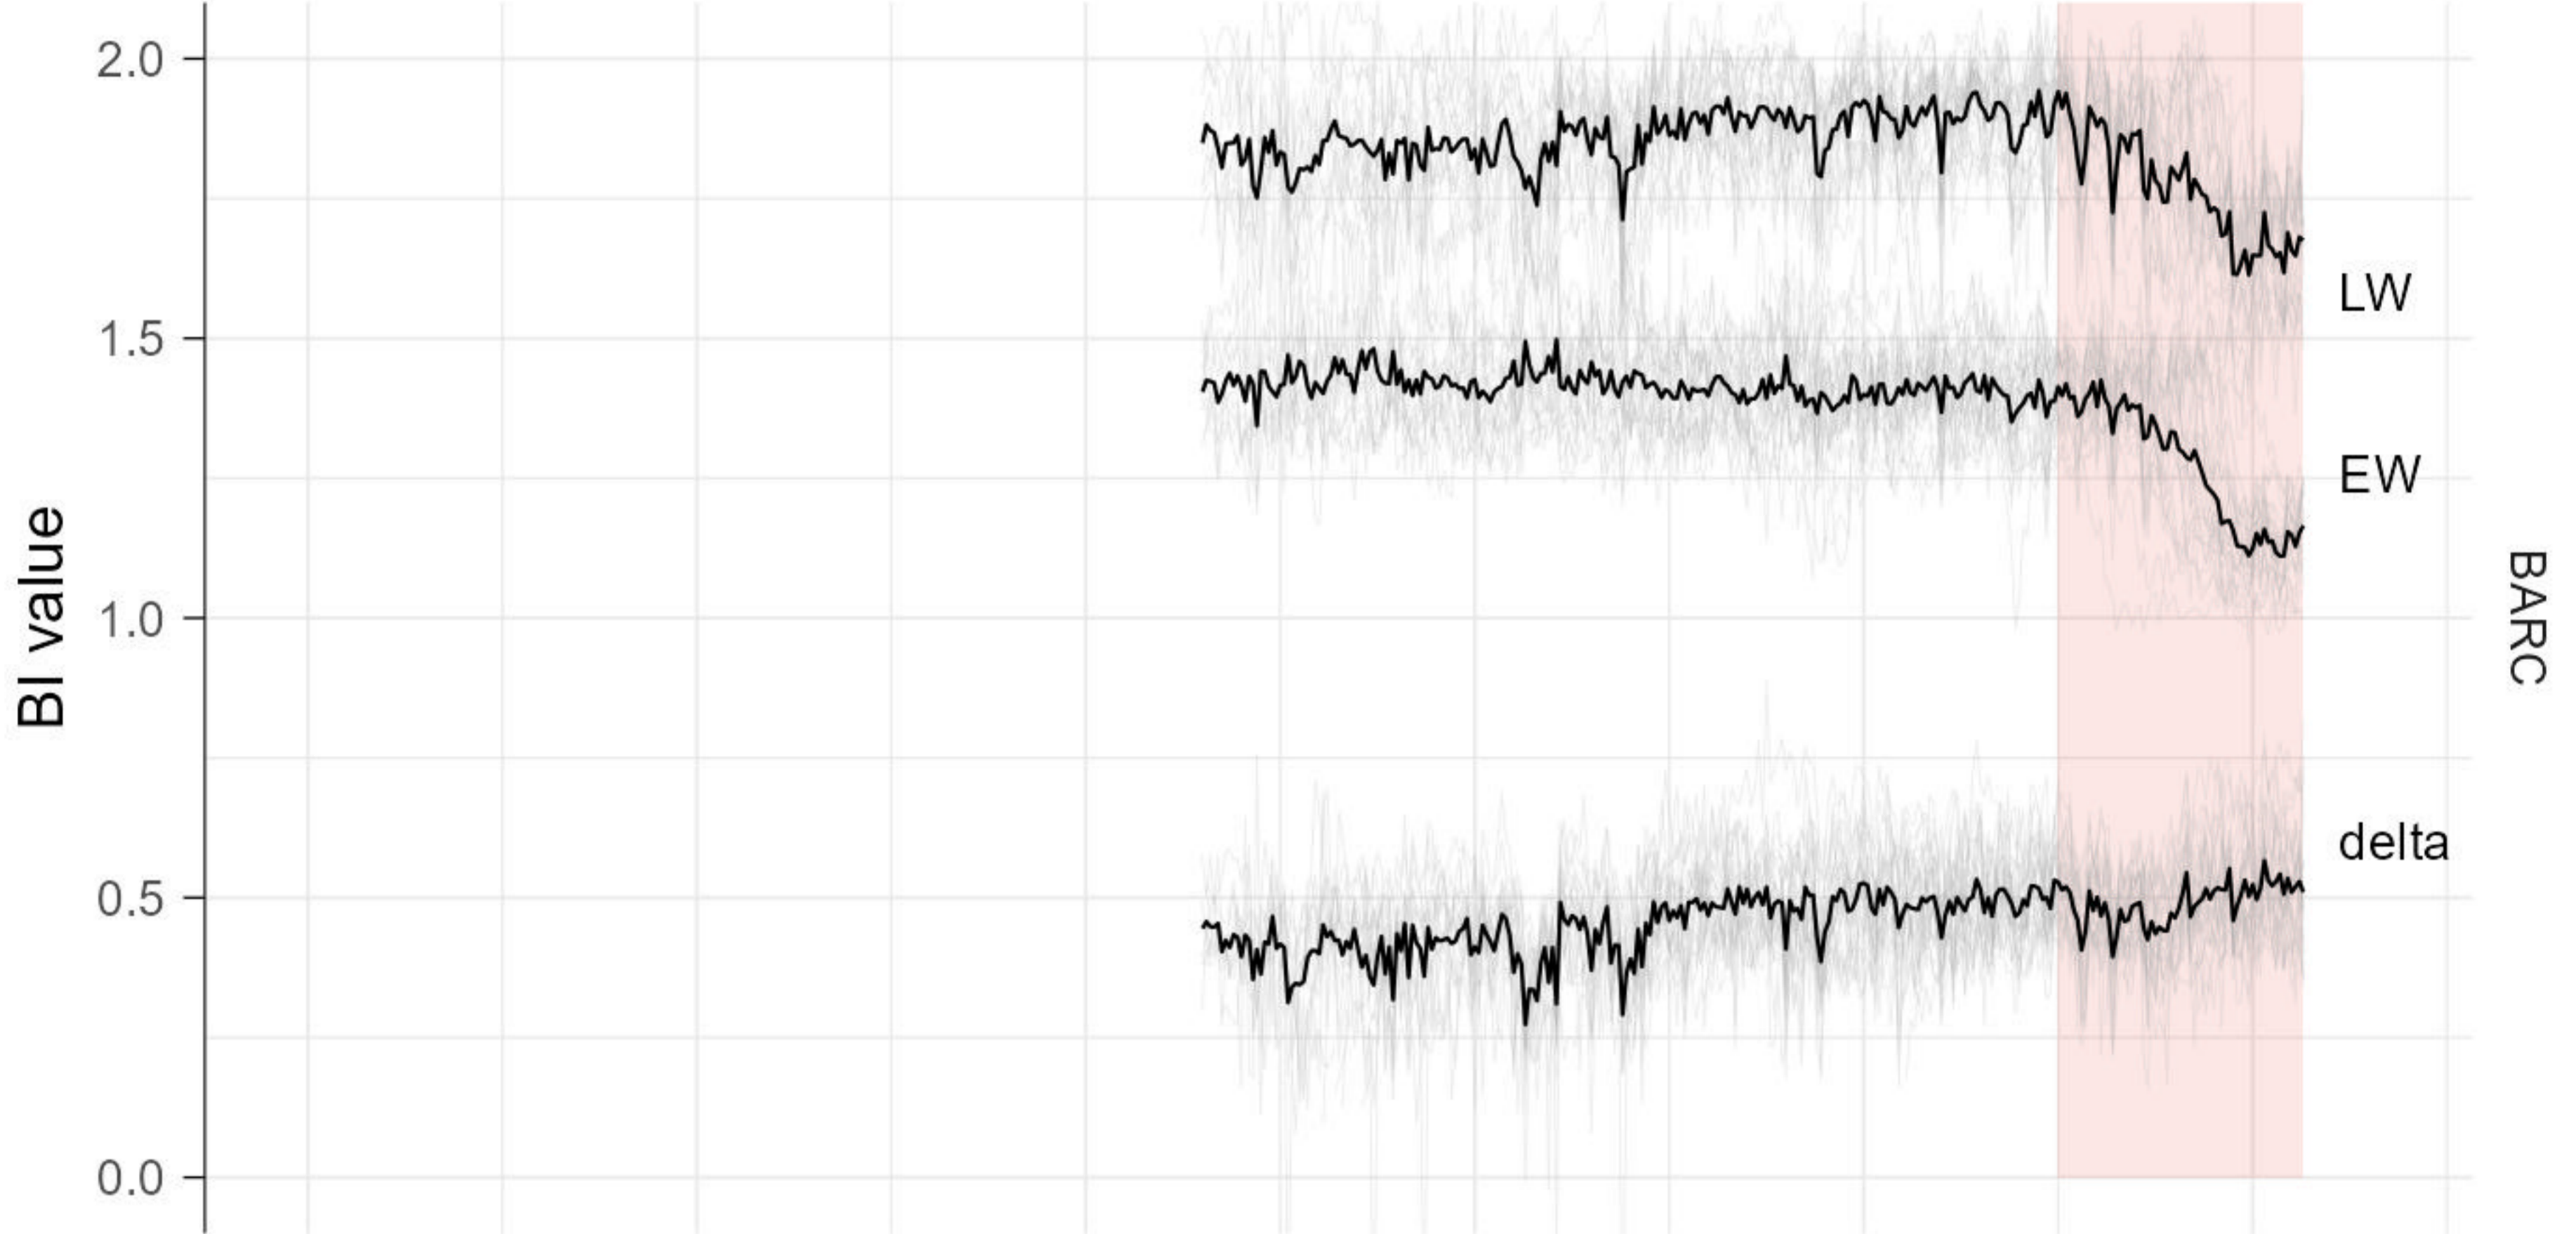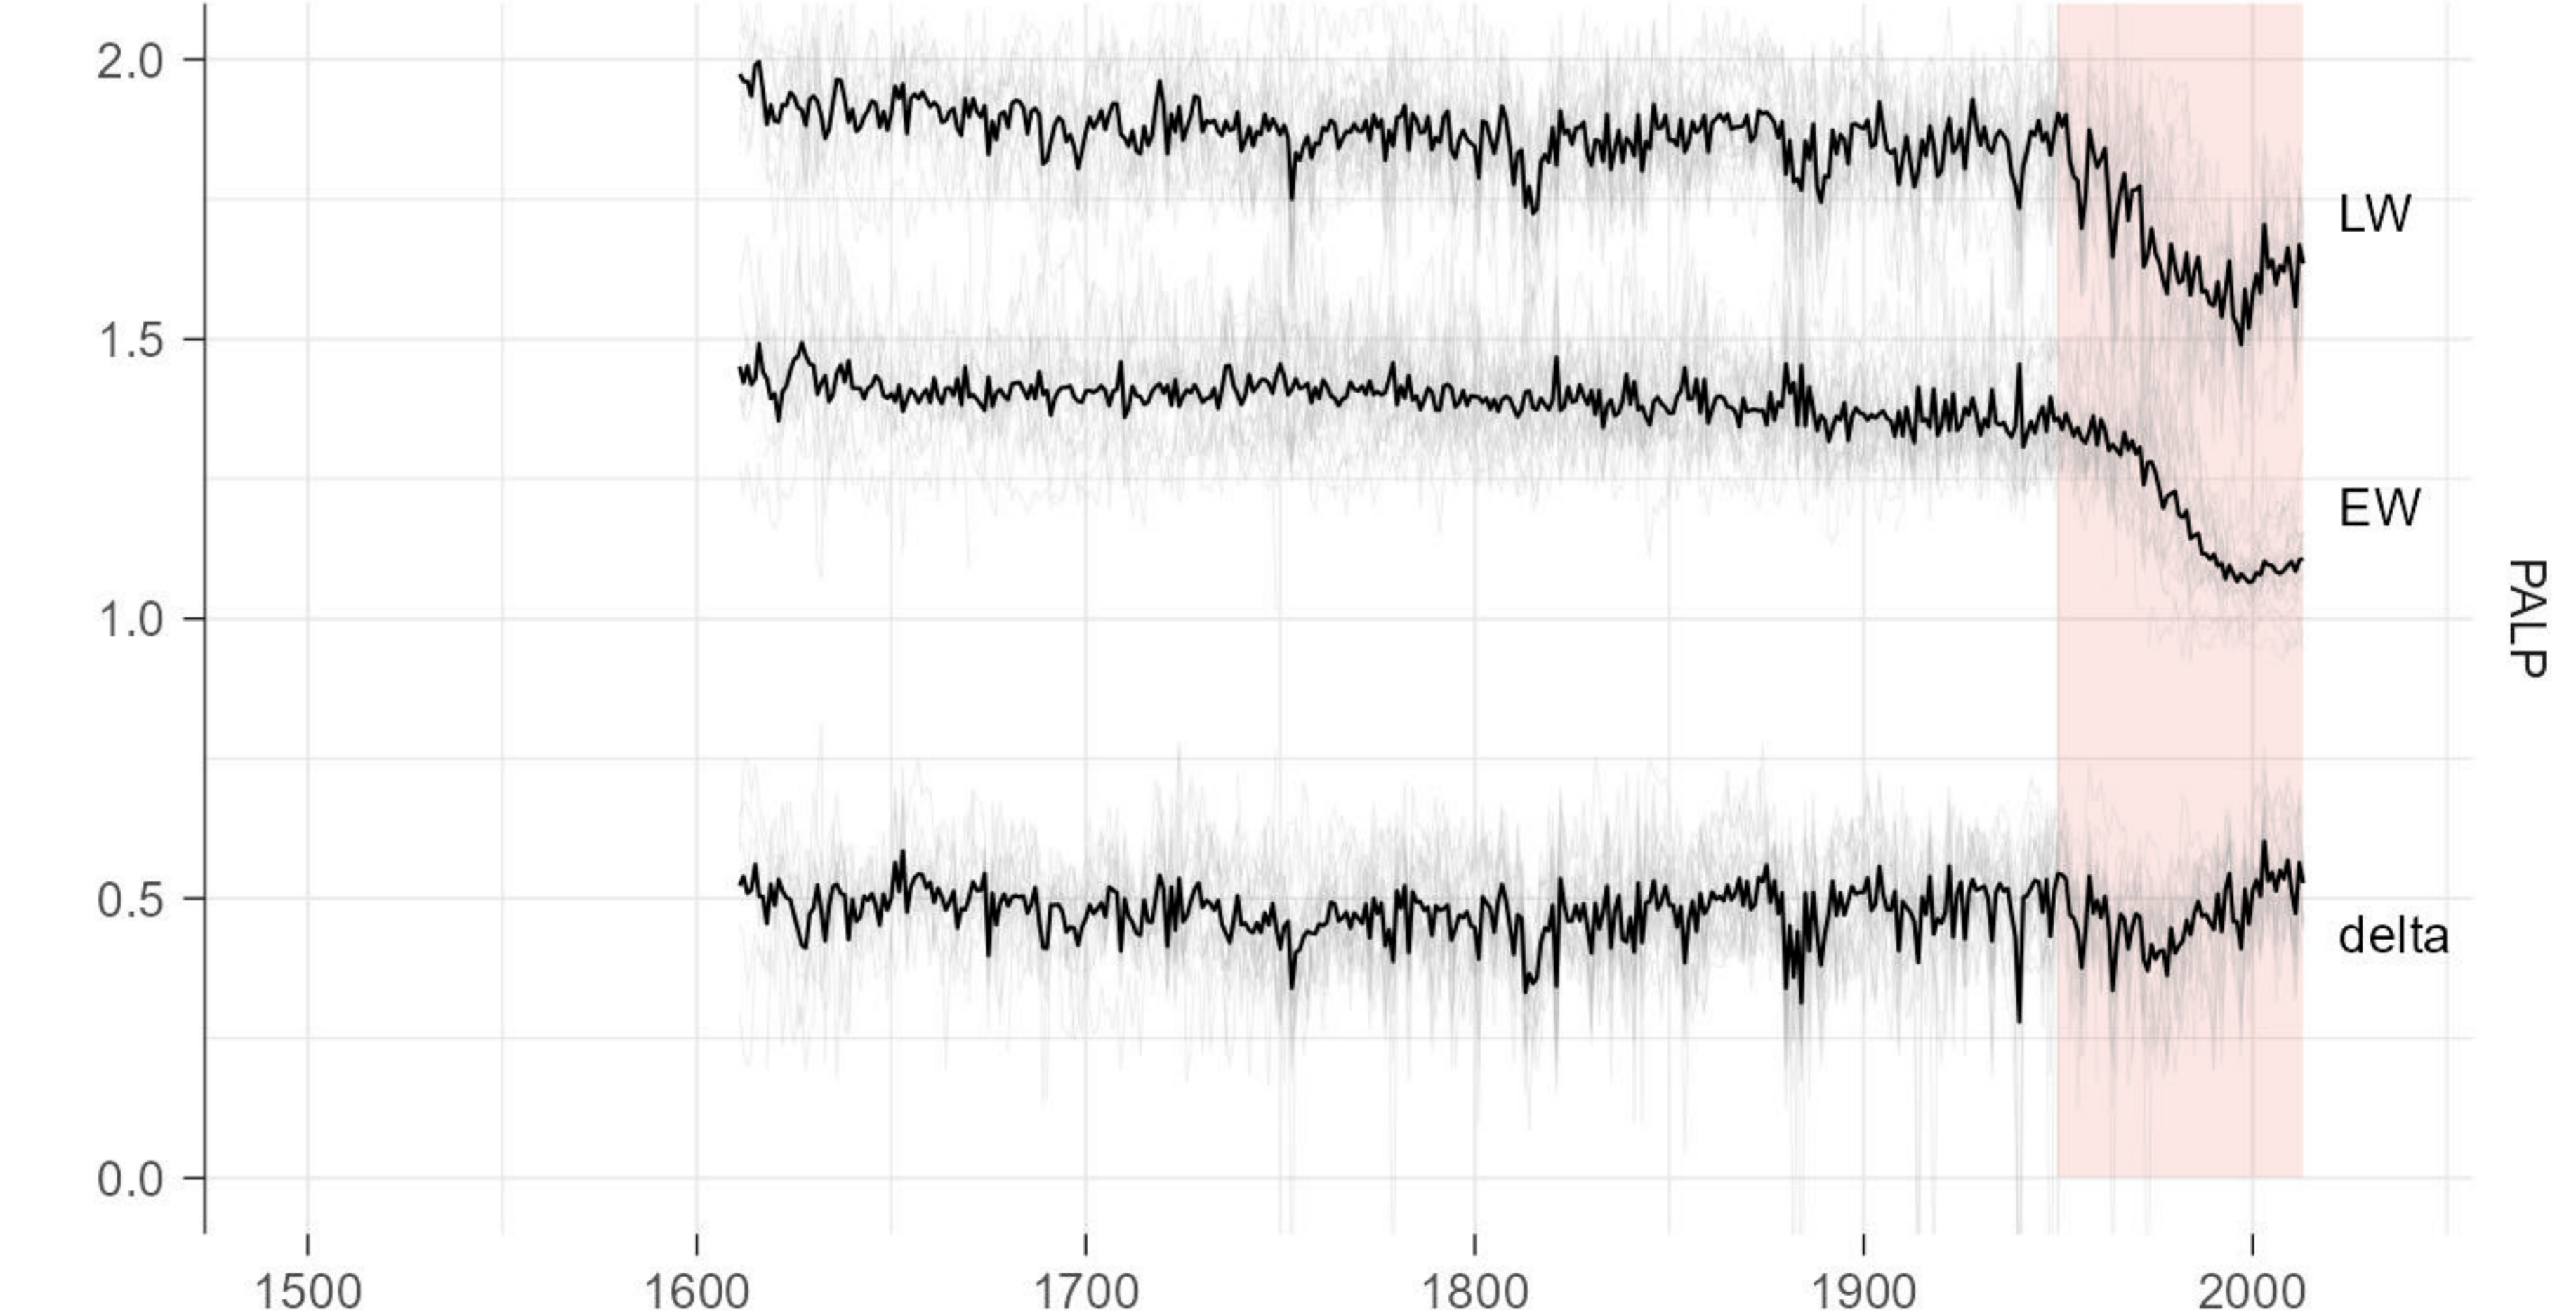

Supplement: Supplementary file [file cp-2023-104-AC2-supplement.pdf]
